# Supplementary material for: RNA Molecular Signature Profiling in PBMCs of Sporadic ALS Patients: HSP70 Overexpression Is Associated with Nuclear SOD1
Source: Cells. 2022 Jan 15;11(2):293. doi: 10.3390/cells11020293 (PMC8774074; doi:10.3390/cells11020293)
Supplement: Supplementary file 1 [file cells-11-00293-s001.zip › cells-1504722-supplementary.xlsx]

## Sheet: Supplementary Table S1
Transcript ID	log2FoldChange	Gene Name	Gene Biotype	Stats
ENSG00000282960	7.52131557043765	KDM4C	protein_coding	4.15243
ENSG00000213197	3.43318968024838	AC012066.1	processed_pseudogene	3.78482
ENSG00000113361	3.00036926599837	CDH6	protein_coding	3.74508
ENSG00000205456	2.53512639275729	TP53TG3D	protein_coding	3.53887
ENSG00000108950	2.52453286905801	FAM20A	protein_coding	4.08198
ENSG00000160307	2.42937741396295	S100B	protein_coding	3.76692
ENSG00000278558	2.42472842821478	TMEM191B	protein_coding	3.75177
ENSG00000267342	2.29936464816193	RP11-552F3.10	antisense	3.41699
ENSG00000178115	2.04808456161896	GOLGA8Q	protein_coding	3.91817
ENSG00000248810	1.97245744012298	RP11-362F19.1	lincRNA	5.31487
ENSG00000179071	1.94853286778044	CCDC89	protein_coding	3.53194
ENSG00000265690	1.69865070287264	RP11-5A19.5	protein_coding	3.70698
ENSG00000213172	1.55873488377518	RP1-228H13.2	processed_pseudogene	3.52282
ENSG00000225217	1.51587206743831	HSPA7	unprocessed_pseudogene	3.69098
ENSG00000168874	1.49183756412985	ATOH8	protein_coding	3.6847
ENSG00000167123	1.4837029499073	CERCAM	protein_coding	3.41477
ENSG00000277887	1.47463149202592	SNORA50C	snoRNA	3.34811
ENSG00000182584	1.42667506474105	ACTL10	protein_coding	3.94724
ENSG00000279035	1.41749572299054	RP11-649A18.3	TEC	3.48611
ENSG00000267265	1.35440619037764	CTC-550B14.7	antisense	3.46463
ENSG00000113555	1.34982712725523	PCDH12	protein_coding	3.4864
ENSG00000234534	1.32798325159191	CSNK1G2P1	processed_pseudogene	3.82503
ENSG00000174327	1.31263293223441	SLC16A13	protein_coding	4.87255
ENSG00000260852	1.29499104645243	FBXL19-AS1	antisense	5.18305
ENSG00000246731	1.29434272200613	MGC16275	antisense	3.91111
ENSG00000244682	1.28846469571542	FCGR2C	polymorphic_pseudogene	3.38415
ENSG00000281887	1.26629588706563	GIMAP1-GIMAP5	protein_coding	3.75408
ENSG00000196159	1.24812256098341	FAT4	protein_coding	3.70379
ENSG00000171914	1.24215111349475	TLN2	protein_coding	4.69197
ENSG00000250995	1.22891519249441	RP13-128O4.3	processed_pseudogene	3.35897
ENSG00000206811	1.1942733692373	SNORA10	snoRNA	3.3921
ENSG00000188282	1.18570434284884	RUFY4	protein_coding	3.77341
ENSG00000258056	1.12385840146588	RP11-644F5.11	antisense	4.64454
ENSG00000183773	1.08332436905338	AIFM3	protein_coding	3.34914
ENSG00000088881	1.07305484919398	EBF4	protein_coding	3.3713
ENSG00000272908	1.05750802461125	RP11-121A8.1	lincRNA	3.76231
ENSG00000279672	1.05279843661825	CMB9-55F22.1	TEC	3.38686
ENSG00000228140	1.03601102734597	RP3-467K16.4	lincRNA	3.38287
ENSG00000197182	1.01390517105201	MIRLET7BHG	lincRNA	5.07132
ENSG00000227032	1.00130120553494	RPS2P36	processed_pseudogene	3.35429
ENSG00000251867	-1.8889163144791	RP11-48B3.5	antisense	-3.6832
ENSG00000155090	-1.29119167656028	KLF10	protein_coding	-3.50247
ENSG00000175985	-1.34024220813713	PLEKHD1	protein_coding	-3.40757
ENSG00000274943	-1.39791792460496	RP11-351C21.2	sense_intronic	-3.5314
ENSG00000105855	-1.7233577156103	ITGB8	protein_coding	-3.46212
ENSG00000154928	-1.97846639716329	EPHB1	protein_coding	-3.39684
ENSG00000273338	-2.00581553510598	RP11-386I14.4	antisense	-3.75347
ENSG00000183625	-2.033818502528	CCR3	protein_coding	-4.13439
ENSG00000115602	-2.24329928981437	IL1RL1	protein_coding	-4.08861
ENSG00000149516	-2.40878002447957	MS4A3	protein_coding	-3.89963
ENSG00000246363	-2.42386858944451	RP11-13A1.1	lincRNA	-3.78327
ENSG00000196549	-2.51448439700376	MME	protein_coding	-3.70671
ENSG00000149534	-2.72219915817	MS4A2	protein_coding	-4.13926
ENSG00000140287	-2.98037532537816	HDC	protein_coding	-5.07
ENSG00000259717	-3.05787307358582	LINC00677	lincRNA	-3.47832
ENSG00000105205	-3.12858532843734	CLC	protein_coding	-4.33469
ENSG00000124469	-3.15277182309077	CEACAM8	protein_coding	-3.36483
ENSG00000204455	-3.25588473635444	TRIM51BP	unprocessed_pseudogene	-3.36491
ENSG00000250696	-3.48129785669236	RP11-704M14.1	antisense	-3.57614
ENSG00000005108	-3.60714266160544	THSD7A	protein_coding	-4.05936
ENSG00000119121	-3.74960547589506	TRPM6	protein_coding	-4.61235
ENSG00000134827	-3.79351543723891	TCN1	protein_coding	-3.45537

## Sheet: Supplementary Table S2
Transcript ID	log2FoldChange	Gene Name	Gene Biotype	Stats
ENSG00000167680	4.41141153396196	SEMA6B	protein_coding	4.68376
ENSG00000204388	3.98858942876702	HSPA1B	protein_coding	4.94565
ENSG00000135094	3.24161490612005	SDS	protein_coding	4.1927
ENSG00000280046	2.70188427795239	RP11-1099M24.6	TEC	4.74361
ENSG00000204389	2.03299955046361	HSPA1A	protein_coding	3.90186
ENSG00000225964	1.90193935607654	NRIR	antisense	3.93889
ENSG00000139354	1.88481211809689	GAS2L3	protein_coding	3.73164
ENSG00000168386	1.79171274414036	FILIP1L	protein_coding	4.45922
ENSG00000246731	1.57637117434868	MGC16275	antisense	4.59191
ENSG00000260401	1.56340394144516	RP11-800A3.4	sense_overlapping	4.00074
ENSG00000260368	1.50323340586512	RP11-521I2.3	sense_overlapping	3.78377
ENSG00000134247	1.40550554950708	PTGFRN	protein_coding	3.89275
ENSG00000120694	1.25930759944865	HSPH1	protein_coding	4.01318
ENSG00000114737	1.21658625634824	CISH	protein_coding	3.75601
ENSG00000182580	1.17317696051547	EPHB3	protein_coding	3.75139
ENSG00000178718	1.07270037190965	RPP25	protein_coding	3.79083
ENSG00000212719	1.01344397191424	C17orf51	protein_coding	4.25729
ENSG00000257242	-1.07500240173783	LINC01619	processed_transcript	-4.09442
ENSG00000053524	-1.11229105846428	MCF2L2	protein_coding	-4.15215
ENSG00000238090	-1.12883860990823	AC006195.2	processed_pseudogene	-4.08001
ENSG00000198590	-1.15812827035902	C3orf35	lincRNA	-4.9519
ENSG00000062524	-1.2658181952968	LTK	protein_coding	-3.7618
ENSG00000157985	-1.27285771604886	AGAP1	protein_coding	-3.85842
ENSG00000232811	-1.79322447224647	RP11-96K19.2	antisense	-4.67137
ENSG00000218713	-2.37708149831829	RP1-34L19.1	processed_pseudogene	-3.77937
